# Supplementary material for: The Bacillus cereus Hbl and Nhe Tripartite Enterotoxin Components Assemble Sequentially on the Surface of Target Cells and Are Not Interchangeable
Source: PubMed Central journal article supplement (PMC3799921; doi:10.1371/journal.pone.0076955), 2013-10-18
Supplement: pone.0076955.s001.pdf [file pone.0076955.s001.pdf]

**Table S1: Primers used in this study**

| Name                     | 5'- 3' sequence                                                                                                             | Purpose                                          |
|--------------------------|-----------------------------------------------------------------------------------------------------------------------------|--------------------------------------------------|
| pHbl_up1<br>pHbl_up1     | tgtttggttcaatTTTatggatca<br>ttggcattgcgagtgTattg                                                                            | PCR of <i>hbl-2</i><br>upstream region           |
| pHbl_down1<br>pHbl_down2 | ttggaaaacattaagagcagatg<br>tcgcaatcatagatcgtttcc                                                                            | PCR of <i>hbl-2</i><br>downstream<br>region      |
| Hbl-LF1<br>Hbl-LF2       | <i>ccccgaattc</i> ggaagctttgcagctttt<br><i>cccactagtcc</i> gctctctttgtaaactgga                                              | Hbl genetic<br>deletion,<br>upstream region      |
| Hbl-RF1<br>Hbl-RF2       | <i>ccccgaattc</i> ccaagtaattggagctggaga<br><i>cccactagtac</i> aggaggtcccagtacc                                              | Hbl genetic<br>deletion,<br>downstream<br>region |
| rHblBfw<br>rHblBrv       | <i>aacat</i> atgttggaggaaaatgaaatgat<br><i>AAGGATCC</i> <u>tattagtgatggtgatgatgatg</u> ttttgtggagtaacagttcca                | Cloning of HblB                                  |
| rHblL1fw<br>rHblL1rv     | <i>ggatta</i> atgaaaaaattccattcaaagtactaac<br><i>aaggatcct</i> <u>tattagtgatggtgatgatgatg</u> ctcctgtttaaagcaatatctttg      | Cloning of Hbl-<br>L <sub>1</sub>                |
| rHblL2fw<br>rHblL2rv     | <i>aacat</i> atgaaaactaaaataatgacaggattt<br><i>aaggatcct</i> <u>tattagtgatggtgatgatgatg</u> aaattatatacttgttcttcaaggtaactta | Cloning of Hbl-<br>L <sub>2</sub>                |
| rNheAfw<br>rNheArv       | <i>aacat</i> atgaaaaagactttaattacagggttattg<br><i>aaggatcct</i> <u>tattagtgatggtgatgatgatg</u> tacttcaacgttgtaacgtaac       | Cloning of<br>NheA                               |
| rNheBfw<br>rNheBrv       | <i>aacat</i> atgacaaaaaacatataaaagtaatgg<br><i>aaggatcct</i> <u>tattagtgatggtgatgatgatg</u> ctttttcgtgtctactactttaatc       | Cloning of<br>NheB                               |
| rNheCfw<br>rNheCrv       | <i>aacat</i> atgcagaaacgattttataaaaaatg<br><i>aaggatcct</i> <u>tattagtgatggtgatgatgatg</u> ctttgccacacctcatgtaatt           | Cloning of<br>NheC                               |

Italicized letters indicate restriction recognition sites for *Bam*HI, *Ase*I, *Nde*I, *Eco*RI, or *Spe*I. Underlined letters indicate histidine tags and stop codons.
